# Supplementary material for: Root Production and Microbe-Derived Carbon Inputs Jointly Drive Rapid Soil Carbon Accumulation at the Early Stages of Forest Succession
Source: MDPI journal article supplement (doi:10.3390/f13122130), 2022-12-12
Supplement: s1 [file s1]

**Table S1.** Stand characteristics at different stages of forest succession (Mean(SD)).

| Successional stage | Dominant tree species                                     | Accompanying tree species                                                                  | Shrub                                                                                      | Community height (m) | Basal area (m <sup>2</sup> ha <sup>-1</sup> ) | Stem density (ha <sup>-1</sup> ) | Floor carbon stock (kg C m <sup>-2</sup> ) |
|--------------------|-----------------------------------------------------------|--------------------------------------------------------------------------------------------|--------------------------------------------------------------------------------------------|----------------------|-----------------------------------------------|----------------------------------|--------------------------------------------|
| Early stage        | <i>Schima superba</i>                                     | <i>Lithocarpus glaber</i>                                                                  | <i>Litsea cubeba</i> (Lour.) Pers,<br><i>Ficus erecta</i> Thunb.<br>var. <i>beeheyana</i>  | 4.9 (0.8)b           | 8.2 (1.8)b                                    | 18413 (5944)a                    | 5.3(1.2)a                                  |
| Middle stage       | <i>Schima superba</i>                                     | <i>Lithocarpus glaber</i> ,<br><i>Castanopsis fargesii</i> ,<br><i>Castanopsis carlesi</i> | <i>Lithocarpus glaber</i> ,<br><i>Rhododendron ovatum</i> ,<br><i>Eurya japonica</i> Thunb | 13.2 (2.5)a          | 31.9 (12.8)a                                  | 6346 (2217)b                     | 4.0(0.7)ab                                 |
| Late stage         | <i>Castanopsis fargesii</i><br><i>Castanopsis carlesi</i> | <i>Alniphyllum fortunei</i> ,<br><i>Liquidambar formosana</i> Hance                        | <i>Camellia fraterna</i> ,<br><i>Eurya japonica</i> Thunb                                  | 11.2 (3.2)a          | 50.3 (12.5)a                                  | 4933 (1096)b                     | 3.6(0.4)b                                  |

Note: Diverse lowercase letters indicate significant difference ( $P<0.05$ ). Stem density refers to the number of individuals.
